# Supplementary material for: Reconstruction of Intratelencephalic Neurons in the Mouse Secondary Motor Cortex Reveals the Diverse Projection Patterns of Single Neurons
Source: Front Neuroanat. 2018 Oct 30;12:86. doi: 10.3389/fnana.2018.00086 (PMC6218457; doi:10.3389/fnana.2018.00086)
Supplement: Supplementary file 1 [file Table_1.XLSX]

## Sheet: Sheet1
NO	Bregma(mm)	ML(μm)	Distance to pia(μm)	Axon length(mm)	Axon bifurcations	Axon tips	Axon branches	Branch order_max	Dendrite length (mm)	Dendrite bifurcations	Dendrite tips	Dendrite branches	Branch order_max		Dendrite
MOs -Layer5-CPN
#1	2.43875	920.5	320	294.146	1280	1281	2560	46	7.855	66	67	132	12
#2	2.45125	1226.5	317	312.521	993	994	1986	48	8.476	89	90	178	13
#3	2.5075	1266.75	260	212.795	609	610	1219	34	6.2	59	60	118	16
#4	2.48875	1231.33	241	180.036	988	989	1976	52	7.178	65	66	130	13
#5	2.38875	1250.33	286	305.523	2546	2547	5093	119	7.413	82	83	164	15
#6	2.42625	1218	250	318.432	2476	2477	4952	94	7.294	70	71	140	18
MOs -Layer2-CPN
#7	2.801	428	108	74.934	329	330	658	36	5.596	62	63	124	16
#8	2.876	602	81	77.336	408	409	816	54	5.594	69	70	138	17
#9	2.914	667	137	80.857	458	459	916	35	5.44	58	59	116	13
#10	2.914	849	150	84.084	723	724	1447	54	6.879	83	84	166	12
#11	2.626	1238.25	81	57.931	352	353	705	49	6.525	85	86	170	15
#12	2.401	1322.17	51	66.11	709	710	1419	73	5.902	89	90	178	16
#13	2.658	1330.5	150	69.213	652	653	1305	71	6.274	72	73	144	11
#14	2.57	1331.67	174	74.219	931	932	1863	75	6.919	70	71	140	11
#15	2.514	1424.67	88	67.998	473	474	947	38	7.217	86	87	172	14
#16	2.526	1575.67	115	73.884	617	618	1235	37	7.083	93	94	186	17
MOs -Layer2-APN
#17	2.67625	462.33	70	51.707	384	385	769	37	5.91	71	72	142	13
#18	2.83875	512.33	102	52.863	425	426	850	35	4.926	59	60	118	12
#19	2.83875	559	112	69.054	542	543	1084	44	5.081	54	55	108	14
#20	2.87625	734	95	63.487	385	386	771	42	5.655	66	67	132	15
#21	2.76375	849.33	70	70.691	433	434	866	38	5.727	73	74	146	18
#22	2.93875	911	150	70.071	622	623	1245	47	6.042	84	85	168	18
#23	2.87625	1092	113	78.696	508	509	1016	46	6.415	82	83	164	15
PL -Layer2
#24	2.86375	316	108	75.309	407	408	814	25	6.216	63	64	126	15
#25	2.90125	559	125	56.317	253	254	506	26	7.311	70	71	140	16
#26	2.90125	522	136	72.045	450	451	901	44	4.433	52	53	104	11
#27	2.80125	202	125	64.782	443	444	887	31	4.954	57	58	114	14
#28	2.8325	332	152	46.31	402	403	805	45	5.175	55	56	110	16
#29	2.795	263.33	185	78.038	504	505	1008	28	6.553	70	71	140	10
#30	2.795	183	183	71.905	442	443	885	41	5.651	62	63	124	12
#31	2.845	206	168	64.246	350	351	701	30	5.25	58	59	116	16
#32	2.8325	208	182	65.208	611	612	1223	55	4.462	51	52	102	12
#33	2.8325	243.33	200	82.474	494	495	988	29	5.602	64	65	128	17
#34	2.87	254.33	188	54.397	457	458	914	43	5.271	60	61	120	11
#35	2.8325	274	220	70.878	479	480	958	36	6.253	63	64	126	11
#36	2.8325	297.33	240	59.457	507	508	1014	37	5.95	68	69	136	12
